# Supplementary material
Source: PubMed Central journal article supplement (PMC1088855)
Supplement: PB012113s01.pdf [file PB012113s01.pdf]

This is an electronic appendix to the paper by Thomas *et al.* 2001 (Molecular motors: thermodynamics and the random walk). Proc R. Soc. Lond. B **268**, 2113-2122.

Electronic appendices are refereed with the text. However, no attempt has been made to impose a uniform editorial style on the electronic appendices.

## **APPENDIX A: THE ORIGIN OF $D_{eff}$ AND $\tau$ FOR A TWO-STATE MOTOR**

To see more physically how the reduction of the diffusion coefficient in (7.38) arises, consider the time derivative of the diffusion equation (7.28)

$$\partial^2 p / \partial t^2 = D \partial^2 / \partial x^2 (\partial p / \partial t) - v \partial / \partial x (\partial p / \partial t) - \tau \partial^3 p / \partial t^3. \quad (A1)$$

When the probability density  $p$  is slowly varying, the third derivatives on the RHS may be neglected, in which case, using the diffusion equation (7.28), we find that

$$\partial^2 p / \partial t^2 \approx v^2 \partial^2 p / \partial x^2. \quad (A2)$$

The same result applies to the diffusion equation (6.17) for the biased random walk. It reflects the wave-like propagation of the probability-density peak at the average stepping velocity  $v$  along the motor's track, as illustrated in figure 4a. From (A2), one can see that the  $\tau \partial^2 p / \partial t^2$  term in (7.28) therefore partially cancels the  $D \partial^2 p / \partial x^2$  term, effectively reducing the diffusion coefficient  $D_{eff}$  in (7.38) from  $D$  to  $D - v^2 \tau$ .

To understand the physical meaning of  $\tau$ , consider an ensemble of two-state motors, each subjected to the same load  $f$ . The motors are either in state 1 or state 2, and, summing over all attachment sites  $n$  in (7.24) and (7.25), we may denote the probabilities for being in the two states as  $P_1$  and  $P_2$ . It follows from (7.24) that the rate equation for  $P_1$  is

$$dP_1 / dt = k_2 P_2 - k_2 P_1 + k_{-1} P_2 - k_1 P_1 = -P_1 / \tau + (k_2 + k_{-1}), \quad (A3)$$

where we have used (7.29) together with the normalization condition  $P_1 + P_2 = 1$ . Hence, the ensemble probabilities  $P_1$  and  $P_2$  approach their steady-state values with the time constant  $\tau$ . At steady state,  $dP_1/dt = dP_2/dt = 0$ , and the average hydrolysis rate  $R$  is

$$R = k_1 P_1 - k_{-1} P_2 = k_2 P_2 - k_{-2} P_1, \quad (\text{A4})$$

which together with (2.2) produces an average steady-state stepping velocity  $v$  in agreement with (7.30). Furthermore, the time derivative of (A3) yields

$$dP_1/dt + \tau d^2 P_1/dt^2 = 0, \quad (\text{A5})$$

which is what we would obtain by integrating the diffusion equation (7.28) for the probability density over all space (assuming that  $p$  and  $\partial p/\partial x$  vanish asymptotically). Hence the important  $\tau \partial^2 p/\partial t^2$  term in (7.28) arises from the motor's approach to steady-state stepping with the time constant  $\tau$ . The one-state motor in (6.17) effectively has  $\tau = 0$  and always maintains steady-state stepping, whilst the two-state motor has an internal time constant  $\tau$  that introduces a time lag into the response of  $\partial p/\partial t$  in (7.28). The  $\tau \partial^2 p/\partial t^2$  term opposes the change in the probability density  $p$  due to the diffusion term  $D \partial^2 p/\partial x^2$ , and (A2) shows that at steady state it effectively reduces the diffusion coefficient in (7.38). Note that the time constant  $\tau$  also gives rise mathematically to the second branch of the dispersion relation in (7.37), representing an exponential decay with a time constant that is very short compared to the time scale on which we observe diffusion (as in figure 4a).

## **APPENDIX B: THE KINETICS OF ALTERNATING HEADS**

The stepping of a processive motor such as kinesin or myosin V in figure 1 requires that the two heads  $A$  and  $B$  operate alternately. The complete cycle therefore consists of two steps, first for head  $A$  and then for head  $B$ . This is particularly important if the heads are not equivalent, as

occurs for some members of the kinesin superfamily (Hirokawa 1998). Hence the proper thermodynamic relation in place of (4.9) for a one-state motor with two alternating heads is

$$k_{A+}k_{B+}/k_B k_{A-} = \exp[-2(\Delta G + u_0 f)/kT], \quad (\text{B1})$$

where  $k_{A+}$  and  $k_{A-}$  are the forward and backward rate constants for head  $A$ , whilst  $k_{B+}$  and  $k_{B-}$  are the corresponding rate constants for head  $B$ . The rate equations are

$$dp_{A,n}/dt = k_{B+}p_{B,n-1} - k_{A-}p_{A,n} + k_{B-}p_{B,n+1} - k_{A+}p_{A,n}, \quad (\text{B2a})$$

$$dp_{B,n}/dt = k_{A-}p_{A,n+1} - k_{B+}p_{B,n} + k_{A+}p_{A,n-1} - k_{B-}p_{B,n}. \quad (\text{B2b})$$

In the continuum approximation, these equations become

$$\partial p_A/\partial t = \frac{1}{2}u_0^2(k_{B+} + k_{B-})\partial^2 p_B/\partial x^2 - u_0(k_{B+} - k_{B-})\partial p_B/\partial x + (k_{B+} + k_{B-})p_B - (k_{A+} + k_{A-})p_A, \quad (\text{B3a})$$

$$\partial p_B/\partial t = \frac{1}{2}u_0^2(k_{A+} + k_{A-})\partial^2 p_A/\partial x^2 - u_0(k_{A+} - k_{A-})\partial p_A/\partial x + (k_{A+} + k_{A-})p_A - (k_{B+} + k_{B-})p_B. \quad (\text{B3b})$$

Neglecting terms in  $\partial^3 p/\partial x^3$  and  $\partial^4 p/\partial x^4$ , we find that the probability densities obey the diffusion equation (7.28), where

$$v = 2u_0(k_{A+}k_{B+} - k_{A-}k_{B-})/(k_{A+} + k_{A-} + k_{B+} + k_{B-}), \quad (\text{B4a})$$

$$D = 2u_0^2(k_{A+}k_{B+} + k_{A-}k_{B-})/(k_{A+} + k_{A-} + k_{B+} + k_{B-}), \quad (\text{B4b})$$

$$\tau = 1/(k_{A+} + k_{A-} + k_{B+} + k_{B-}). \quad (\text{B4c})$$

The expressions for  $v$ ,  $D$  and  $\tau$  are just what we would expect from the two-state model (7.29), (7.30) and (7.31) with step size  $2u_0$ , together with  $k_1 = k_{A+}$ ,  $k_2 = k_{B+}$ ,  $k_{-1} = k_{A-}$  and  $k_{-2} = k_{B-}$ . When the two heads are identical,  $k_{A+} = k_{B+} = k_+$  and  $k_{A-} = k_{B-} = k_-$ , and we find that

$$D_{\text{eff}} = D - v^2\tau = \frac{1}{2}u_0^2(k_+ + k_-), \quad (\text{B5})$$

which is the same result as (6.18) for the simple one-state model, where alternation of the two heads was ignored. Hence, when the two heads are identical, we may regard the motor's cycle as consisting of a single step for one head.

### APPENDIX C: CALCULATION OF $D_{eff}$ FOR A THREE-STATE MOTOR

If we look for solutions to (8.44) - (8.46) of the form  $p_1 \sim \exp[i(kx - \omega t)]$ , etc., then it follows that

$$\begin{aligned} & [i\omega - (k_1 + k_{-3})][i\omega - (k_{-1} + k_2)][i\omega - (k_{-2} + k_3)] - k_2k_{-2}[i\omega - (k_1 + k_{-3})] \\ & - k_1k_{-1}[i\omega - (k_{-2} + k_3)] + k_{-3}k_{-2}k_{-1}(1 + u_0ik - \frac{1}{2}u_0^2k^2) + k_1k_2k_3(1 - u_0ik - \frac{1}{2}u_0^2k^2) \\ & - k_3k_{-3}[i\omega - (k_{-1} + k_2)](1 - u_0ik - \frac{1}{2}u_0^2k^2)(1 + u_0ik - \frac{1}{2}u_0^2k^2) = 0. \end{aligned} \quad (C1)$$

Neglecting terms in  $\omega^3$  and  $k^4$ , we find that

$$\begin{aligned} & \omega^2(k_1+k_{-1}+k_2+k_{-2}+k_3+k_{-3}) + i\omega[k_1(k_2+k_{-2}+k_3) + k_{-3}(k_{-1}+k_2+k_{-2}) + k_{-1}(k_{-2}+k_3) + k_2k_3] \\ & - u_0ik(k_1k_2k_3-k_{-3}k_{-2}k_{-1}) - \frac{1}{2}u_0^2k^2(k_1k_2k_3+k_{-3}k_{-2}k_{-1}) = 0. \end{aligned} \quad (C2)$$

To determine the effective diffusion coefficient  $D_{eff}$ , we look for solutions that satisfy the dispersion relation (7.36) in the limit of small  $\omega$  and  $k$ . Substituting  $k\nu - iD_{eff}k^2$  for  $\omega$  in (C2) and keeping terms of  $O(k^2)$ , we find

$$\begin{aligned} & k^2\nu^2(k_1+k_{-1}+k_2+k_{-2}+k_3+k_{-3}) + i(k\nu - iD_{eff}k^2)[k_1(k_2+k_{-2}+k_3) + k_{-3}(k_{-1}+k_2+k_{-2}) + k_{-1}(k_{-2}+k_3) + k_2k_3] \\ & - u_0ik(k_1k_2k_3-k_{-3}k_{-2}k_{-1}) - \frac{1}{2}u_0^2k^2(k_1k_2k_3+k_{-3}k_{-2}k_{-1}) = 0. \end{aligned} \quad (C3)$$

This equation must be true for all  $k$  (in the limit where  $k \rightarrow 0$ ). Hence, setting the coefficients of  $k$  and  $k^2$  equal to zero, we find that the average stepping velocity is

$$\nu = u_0(k_1k_2k_3-k_{-3}k_{-2}k_{-1})/[k_1(k_2+k_{-2}+k_3)+k_{-3}(k_{-1}+k_2+k_{-2})+k_{-1}(k_{-2}+k_3)+k_2k_3], \quad (C4)$$

whilst the diffusion coefficient  $D_{eff}$  for the three-state model is given by

$$\begin{aligned} D_{eff} = & [\frac{1}{2}u_0^2(k_1k_2k_3+k_{-3}k_{-2}k_{-1})-\nu^2(k_1+k_{-1}+k_2+k_{-2}+k_3+k_{-3})]/[k_1(k_2+k_{-2}+k_3) \\ & +k_{-3}(k_{-1}+k_2+k_{-2})+k_{-1}(k_{-2}+k_3)+k_2k_3]. \end{aligned} \quad (C5)$$

Note that the randomness for the three-state model from (7.39), (C4) and (C5) may be written as

$$r = [u_0^2(k_1k_2k_3+k_3k_2k_{-1})-2v^2(k_1+k_{-1}+k_2+k_{-2}+k_3+k_{-3})]/u_0^2(k_1k_2k_3-k_3k_2k_{-1}). \quad (C6)$$

When backward transitions are neglected,  $k_{-1} = k_{-2} = k_{-3} = 0$ , and we find that

$$r = [k_1^2k_2^2 + k_1^2k_3^2 + k_2^2k_3^2]/[k_1k_2 + k_1k_3 + k_2k_3]^2, \quad (C7)$$

in agreement with the theory of Svoboda *et al.* (1994).
